# Supplementary material for: High resolution quantification of SO 2 emissions over India based on TROPOMI observations
Source: Copernicus journal article supplement (doi:10.5194/egusphere-2025-4490), 2025-09-24
Supplement: Supplementary file 1 [file egusphere-2025-4490-supplement.pdf]

# High resolution quantification of SO<sub>2</sub> emissions over India based on TROPOMI observations

Yutao Chen<sup>1,2</sup>, Ronald J. van der A<sup>1</sup>, Jieying Ding<sup>1</sup>, Henk Eskes<sup>1</sup>, Felipe Cifuentes<sup>1,3</sup>, and Pieternel F. Levelt<sup>4,2,1</sup>

<sup>1</sup>Royal Netherlands Meteorological Institute (KNMI), De Bilt, the Netherlands

<sup>2</sup>Department of Geoscience & Remote Sensing, Delft University of Technology (TUD), Delft, the Netherlands

<sup>3</sup>Meteorology and Air Quality Department, Wageningen University & Research (WUR), Wageningen, the Netherlands

<sup>4</sup>National Center for Atmospheric Research (NCAR), Boulder, Colorado, United States

**Correspondence:** Yutao Chen (yutao.chen@knmi.nl) and Jieying Ding ([jieying.ding@knmi.nl](mailto:jieying.ding@knmi.nl))

## S1. The Gaussian-shaped function to derive the spreading kernel $B$

$$f(x) = e^{-\frac{x^2}{2 \cdot \sigma^2}} \quad (S1)$$

with  $\sigma = 1.82$ . The variable  $x$  is the distance from the center of point source grid cell, represented in units of grid cells. Specifically, when  $x = 0$ , it refers to the grid cell containing the point source itself. When  $x = 1$ , it refers to the distance to directly adjacent neighboring grid cells. When  $x = \sqrt{2}$  (approximately 1.414), it refers to the distance to diagonally adjacent grid cells. Additional values of  $x$  represent distances to more distant grid cells, calculated according to their relative positions.

The spreading pattern  $B'$  is defined within a  $9 \times 9$  grid cell area centered on the grid cell containing the point source and is derived from the Eq. S1. The spreading kernel  $B$ , which is used to calculate the sharpening kernel, is the normalized form of  $B'$  and can be expressed as:

$$B = \frac{B'}{\sum_{i=-4}^4 \sum_{j=-4}^4 B'_{ij}} \quad (S2)$$

## S2. The spreading pattern derived from the model-based SO<sub>2</sub> emissions

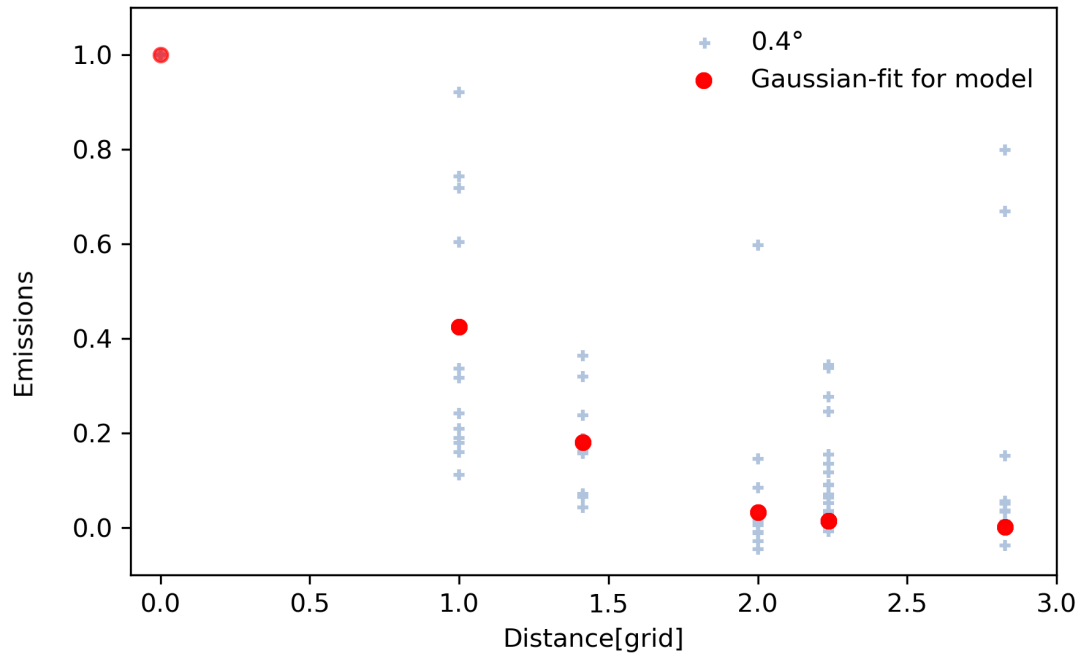

Figure S1. Variation of normalized SO<sub>2</sub> emissions with distance from the point source location, and the corresponding Gaussian-shaped fitting function with the sigma = 0.67. This emission is derived from the annual mean CAMS model results ( $0.4^\circ \times 0.4^\circ$ ). To avoid interference from nearby sources, we selected one isolated point source for this analysis. The point at (0,1) represents the location of the point emissions decrease to near zero within about two grid cells, so we define a  $5 \times 5$  grid cell area centered on the point source as the emission spreading region.

### S3. Point source improvement after deconvolution.

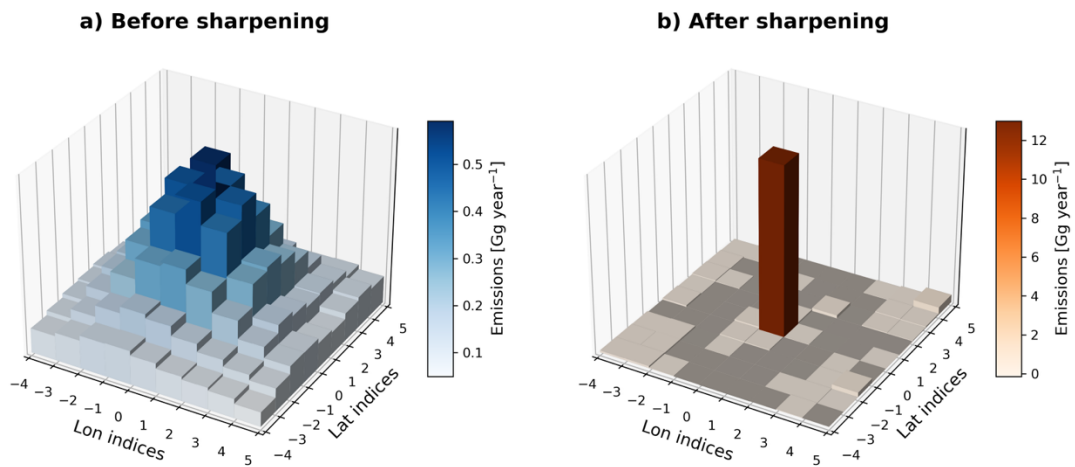

Figure S2. The SO<sub>2</sub> emission distribution a) before sharpening and b) after sharpening centered on a point source within a  $9 \times 9$  grid cell area. This figure is based on the average of 79 selected point sources (See Table S1). The emissions before sharpening follows a 2D Gaussian pattern. The emission after sharpening is more concrete at the point source location and is enhanced approximately 20 times compared to the unsharpened case.

#### S4. Selected SO<sub>2</sub> point sources in India

Table S1. Locations of selected SO<sub>2</sub> point source location used in Fig. S2 and Fig. 8

| Index | Name          | Lat       | Lon       |
|-------|---------------|-----------|-----------|
| 1     | Bara          | 25.19617  | 81.65946  |
| 2     | Kalalgaon     | 25.239    | 87.266    |
| 3     | Chandaria     | 24.962393 | 74.66293  |
| 4     | Chandrapur    | 20.007187 | 79.28928  |
| 5     | Raichur       | 16.35329  | 77.34408  |
| 6     | Rosa          | 27.8186   | 79.9374   |
| 7     | Baradarha     | 21.911436 | 83.188866 |
| 8     | Tirora        | 21.412502 | 79.96731  |
| 9     | Raghunathpur  | 23.62191  | 86.660706 |
| 10    | Wanakbori     | 22.875216 | 73.36176  |
| 11    | Ramagundam    | 18.75453  | 79.459694 |
| 12    | Vindhyachal   | 24.09     | 82.68     |
| 13    | Rayala Seema  | 14.70275  | 78.45775  |
| 14    | Sipat         | 22.1316   | 82.292    |
| 15    | Laharpur      | 23.06633  | 81.78591  |
| 16    | Ukai          | 21.2093   | 73.5574   |
| 17    | Paras         | 20.714735 | 76.79482  |
| 18    | Chelpur       | 18.38351  | 79.8265   |
| 19    | Dadri         | 28.598288 | 77.61014  |
| 20    | Koradi        | 21.247835 | 79.1      |
| 21    | Jhalawar      | 24.52953  | 76.0986   |
| 22    | Tamnar        | 22.098747 | 83.45131  |
| 23    | Talwandi Sabo | 29.92419  | 75.23728  |
| 24    | Farakka       | 24.773598 | 87.89403  |
| 25    | Simhadri      | 17.595188 | 83.089905 |
| 26    | Vijayawada    | 16.599628 | 80.53608  |

|    |                 |           |           |
|----|-----------------|-----------|-----------|
| 27 | Talcher         | 21.095535 | 85.075615 |
| 28 | Nabinagar       | 24.70508  | 84.08919  |
| 29 | Nandgaonpeth    | 21.07823  | 77.90088  |
| 30 | Mettur          | 11.772061 | 77.814865 |
| 31 | Surat           | 21.397985 | 73.107414 |
| 32 | Tanda           | 26.59359  | 82.59682  |
| 33 | Raikheda        | 21.449919 | 81.85247  |
| 34 | Unchahar        | 25.913    | 81.327    |
| 35 | Lalitpur        | 24.79718  | 78.64634  |
| 36 | Dongaliya       | 22.102777 | 76.53611  |
| 37 | Kudgi           | 16.5      | 75.833336 |
| 38 | Barrackpore     | 22.732    | 88.37     |
| 39 | Kothagudem      | 17.621553 | 80.69661  |
| 40 | Kutch           | 23.663885 | 68.78404  |
| 41 | Bhilai          | 21.18372  | 81.42307  |
| 42 | Chowki Motipura | 24.62     | 77.04     |
| 43 | Gandhi Nagar    | 23.244513 | 72.67438  |
| 44 | Birsinghpur     | 23.305834 | 81.065    |
| 45 | Neyveli         | 11.554936 | 79.4439   |
| 46 | Nasik           | 19.981657 | 73.88958  |
| 47 | Sagardighi      | 24.37193  | 88.1041   |
| 48 | Suratgarh       | 29.182514 | 74.019485 |
| 49 | Mundra          | 22.822779 | 69.55278  |
| 50 | Bhadresh        | 25.89213  | 71.32658  |
| 51 | Sterlite        | 21.78498  | 84.0553   |
| 52 | Kota            | 25.1299   | 75.88405  |
| 53 | Nelatur         | 14.32611  | 80.12156  |
| 54 | Tuticorin       | 8.763055  | 78.17149  |
| 55 | Bhusawal        | 21.048285 | 75.84586  |
| 56 | Satpura         | 22.111746 | 78.172066 |

|    |                    |           |           |
|----|--------------------|-----------|-----------|
| 57 | Salakati           | 26.4448   | 90.36323  |
| 58 | Morbi              | 22.799524 | 70.90123  |
| 59 | Gandhi Nagar       | 25.318169 | 74.54007  |
| 60 | Paricha            | 25.5127   | 78.7581   |
| 61 | Chandrapura        | 23.737535 | 86.12696  |
| 62 | Trombay            | 19.0033   | 72.897    |
| 63 | Durgapur           | 23.577469 | 87.209145 |
| 64 | Parli              | 18.86809  | 76.52539  |
| 65 | Torangallu         | 15.183938 | 76.66217  |
| 66 | Barh               | 25.4865   | 85.7452   |
| 67 | Kolaghat           | 22.414848 | 87.87327  |
| 68 | Essar              | 22.333313 | 69.7524   |
| 69 | Indira Gandhi STPP | 28.48502  | 76.37542  |
| 70 | Gujarat            | 22.37142  | 73.11951  |
| 71 | Tata               | 22.785    | 86.2      |
| 72 | Duburi             | 20.96675  | 86.012405 |
| 73 | North Chennai      | 13.25     | 80.33     |
| 74 | Khedar             | 29.34782  | 75.85842  |
| 75 | Panipat            | 29.395813 | 76.8783   |
| 76 | Jaigarh            | 17.297    | 73.212    |
| 77 | Rajpura            | 30.557    | 76.577    |
| 78 | Hazira             | 21.165    | 72.661    |
| 79 | Korba              | 22.3933   | 82.74253  |

## S5. Noise level

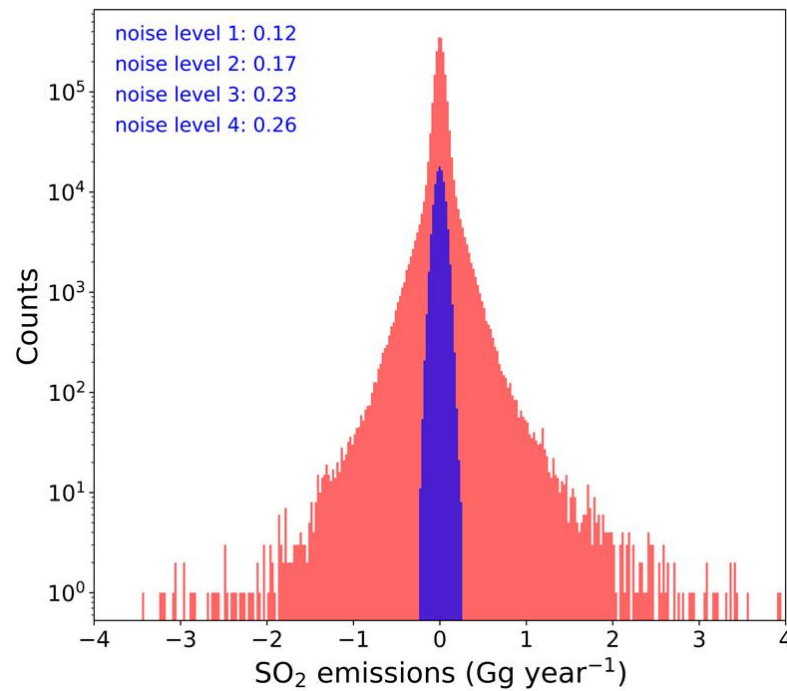

Figure S3. Histogram of the frequency of SO<sub>2</sub> emissions. The red bars represent the frequency of SO<sub>2</sub> emissions within the simulation domain. The blue bars denote the frequency of SO<sub>2</sub> emissions (or the noise) in the selected clean oceanic region (latitude: 5°N-18°N; longitude: 85°E- 90°E). The emissions signal within this clean region are identified as noise. The frequency distribution of noise within the selected clean region approximates a normal distribution with  $\sigma = 0.06$  Gg year<sup>-1</sup>. Based on our tests, we set the detection threshold as three times  $\sigma$  (about 0.17 Gg year<sup>-1</sup> per grid cell). The noise level 0.17 Gg year<sup>-1</sup> is derived from the unsharpened emissions. The noise level after sharpening is enhanced by approximately 20 times, reaching 3.4 Gg year<sup>-1</sup>. See more information in the study from Chen et al. (2025).

## Reference

Chen, Y., van der A, R. J., Ding, J., Eskes, H., Williams, J. E., Theys, N., Tsikerdekis, A., and Levelt, P. F.: SO<sub>2</sub> emissions derived from TROPOMI observations over India using a flux-divergence method with variable lifetimes, *Atmos. Chem. Phys.*, 25, 1851-1868, 10.5194/acp-25-1851-2025, 2025.
